# Supplementary material for: Red cell alloimmunization is associated with development of autoantibodies and increased red cell transfusion requirements in myelodysplastic syndrome
Source: PubMed Central journal article supplement — Haematologica. 2017 Oct 5;102(12):2021–9. doi: 10.3324/haematol.2017.175752 (PMC5709101; doi:10.3324/haematol.2017.175752), 2017-12
Supplement: 2017_175752-Disclosures_and_Contributions.pdf [file 2017_175752-Disclosures_and_Contributions.pdf]

Haematologica  
HAEMATOL/2017/175752  
Version 3

Red cell alloimmunization is associated with development of autoantibodies and increased red cell transfusion requirements in myelodysplastic syndrome

Deepak Singhal, Monika M. Kutyna, Rakchha Chhetri, Li Yan A. Wee, Sophia Hague, Lakshmi Nath, Shriram V. Nath, Romi Sinha, Nicholas Wickham, Ian D. Lewis, David M. Ross, Peter G. Bardy, Luen Bik To, John Reynolds, Erica M. Wood, David J. Roxby, and Devendra K. Hiwase

Disclosures: DH received research funding from Novartis Pharmaceuticals Australia Pty Limited and Celgene Pty Ltd, Australia DMR no relevant conflict of interest to declare. JR is a Novartis Shareholder DS, RC, MK, LAW, LN,SN, SH,RS,NW, DMR, PB,IL, LBT, EW do not have any conflict of interest

Contributions: •DS: Collected the data, analysed and wrote the manuscript •MMK and RC: Collected the data and edited the manuscript •SH: Collected the data and edited the manuscript •RS, LN, SVN, NW, IDL, DMR, PGB, LBT: Provided input in data analysis and edited the manuscript •JR and LAW: Analysed the data and edited the manuscript •DJR: Collected the data, helped in the analysis and edited the manuscript •EMW: Provided critical comments and edited the manuscript •DKH: Developed the project, analysed data and edited the manuscript
